# Supplementary material for: Unraveling MicroRNA Mediated Gene Regulation in Centella Asiatica (L.) Urb. by High-Throughput Sequencing based Small-RNA Profiling.
Source: Research Square preprint supplement (doi:10.21203/rs.3.rs-995211/v1), 2021-10-22
Supplement: Supplementary file 1 [file e52cca186597b90b7217823b.docx]

**Supplementary Table 5: Primer sequences for miRNAs used for q-RT PCR**.

| **miRNA** | **Forward primer** | **Reverse primer** |
| --- | --- | --- |
| miR398b | CAGCGTGTTCTCAGGTC | GGTCCAGTTTTTTTTTTTTTTTCAG |
| miR171f | AGTTGAGCCGTGCCAA | TCCAGTTTTTTTTTTTTTTTGTGCT |
| miR1436 | GCAGACATTATGGGACGGA | GGTCCAGTTTTTTTTTTTTTTTCAG |
| miR156i | GCAGTGACAGAAGAGAGAGA | AGGTCCAGTTTTTTTTTTTTTTTAGG |
| miR396g | AGTCCACAGGCTTTCTTGA | GGTCCAGTTTTTTTTTTTTTTTCATC |
| miR396a | GCAGGGTCAAGAAAGCTGT | GTCCAGTTTTTTTTTTTTTTTATGTTCA |
| miR1171 | AGTGGAGTGGAGTGGAG | GTCCAGTTTTTTTTTTTTTTTGCAG |
| miR171b | AGTTGAGCCGTGCCAT | GGTCCAGTTTTTTTTTTTTTTTGTGA |
| miR2673 | GCCTCTTCCTCTTCCTCTTC | TCCAGTTTTTTTTTTTTTTTGTGCT |
| miR399b | GTGCCAAAGGAGATTTGC | TCCAGTTTTTTTTTTTTTTTGTGCT |
| miR156k | CAGTGACAGAAGAGAGCGA | AGGTCCAGTTTTTTTTTTTTTTTAGG |
| miR156d | GCAGTTGACAGAAGAGAGAGAG | AGGTCCAGTTTTTTTTTTTTTTTAGG |
| miR171g | AGTTGAGCCGTGCCATC | TCCAGTTTTTTTTTTTTTTTGTGCT |
| miR159a | AGCGCAGATTGGATTGAAG | AGGTCCAGTTTTTTTTTTTTTTTAGG |
